# Supplementary material
Source: PubMed Central journal article supplement (PMC5563258)

## *Supporting Information*

### **Towards understanding the structural basis of partial agonism at the dopamine D<sub>3</sub> receptor**

Mayako Michino,<sup>§,#</sup> Comfort A. Boateng,<sup>†,#,&</sup> Prashant Donthamsetti,<sup>‡#</sup> Hideaki Yano,<sup>§</sup> Oluyomi M. Bakare,<sup>†</sup> Alessandro Bonifazi,<sup>†</sup> Michael P. Ellenberger,<sup>†</sup> Thomas M. Keck,<sup>†,^</sup> Vivek Kumar,<sup>†</sup> Clare Zhu,<sup>§</sup> Ravi Verma,<sup>§</sup> Jeffrey R. Deschamps,<sup>+</sup> Jonathan A. Javitch,<sup>‡</sup> Amy Hauck Newman<sup>†\*</sup> and Lei Shi<sup>§,\*</sup>

<sup>§</sup>Computational Chemistry and Molecular Biophysics Unit, Molecular Targets and Medications Discovery Branch, National Institute on Drug Abuse – Intramural Research Program, National Institutes of Health, 333 Cassell Drive, Baltimore, Maryland 21224, United States

<sup>†</sup>Medicinal Chemistry Section, Molecular Targets and Medications Discovery Branch, National Institute on Drug Abuse – Intramural Research Program, National Institutes of Health, 333 Cassell Drive, Baltimore, Maryland 21224, United States

<sup>^</sup>Department of Chemistry & Biochemistry, Department of Biomedical & Translational Sciences College of Science and Mathematics, Rowan University, 201 Mullica Hill Road, Glassboro, New Jersey 08028, United States

<sup>‡</sup>Departments of Psychiatry and Pharmacology, Columbia University College of Physicians and Surgeons, Division of Molecular Therapeutics, New York State Psychiatric Institute, New York, New York 10032, United States

<sup>+</sup>Naval Research Laboratory, Code 6930, 4555 Overlook Avenue, Washington, DC 20375, United States

<sup>&</sup>Department of Basic Pharmaceutical Sciences, Fred Wilson School of Pharmacy, High Point University, One University Parkway, High Point, North Carolina, 27268, United States

<sup>#</sup>Equally Contributing Authors, <sup>\*</sup>Corresponding Authors

Supplemental information Contents:

|                                                                                                            |     |
|------------------------------------------------------------------------------------------------------------|-----|
| Table S1. MD simulations of D <sub>3</sub> R in complex with the full-length compounds and synthons .....  | S3  |
| Table S2. Microanalysis Data.....                                                                          | S3  |
| Table S3. Crystal data and structure refinement for (R)-7 .....                                            | S4  |
| Table S4. Crystal data and structure refinement for (S)-7 .....                                            | S5  |
| Figure S1. Quantitative metrics used by PIA-GPCR .....                                                     | S6  |
| Figure S2. Comparison of the conformations of $\beta$ 1AR bound with partial agonists and antagonists..... | S7  |
| Figure S3. Comparison of the conformations of D3R bound with dopamine and eticlopride.....                 | S8  |
| Figure S4. Mass spectrum Analysis of (R)-4 .....                                                           | S9  |
| Figure S5. Mass spectrum Analysis of (S)-4 .....                                                           | S10 |
| Figure S6. HPLC chromatogram analysis of ( $\pm$ )-4 .....                                                 | S11 |
| Figure S7. HPLC chromatogram analysis of (R)-4 .....                                                       | S11 |
| Figure S8. HPLC chromatogram analysis of (S)-4 .....                                                       | S12 |
| Figure S9. HPLC chromatogram analysis of ( $\pm$ )-7 .....                                                 | S12 |
| Figure S10. HPLC chromatogram analysis of (R)-7 .....                                                      | S13 |
| Figure S11. HPLC chromatogram analysis of (S)-7 .....                                                      | S13 |
| Figure S12. X-ray crystal structure of (R)-7 .....                                                         | S14 |
| Figure S13. X-ray crystal structure of (S)-7 .....                                                         | S14 |

**Table S1. MD simulations of D<sub>3</sub>R in complex with the full-length compounds and synthons**

| Ligand             | Number of trajectories <sup>a</sup> | Simulation lengths (ns)                   | Total lengths (ns) |
|--------------------|-------------------------------------|-------------------------------------------|--------------------|
| <b>3</b>           | 2                                   | 900, 600                                  | 1500               |
| ( <i>R</i> )-4     | 4                                   | 1200, 1200, 300, 300                      | 3000               |
| ( <i>S</i> )-4     | 6                                   | 600, 300, 300, 1500, 1200, 300            | 4200               |
| ( <i>R</i> )-6     | 4                                   | 900, 600, 900, 300                        | 2700               |
| ( <i>S</i> )-6     | 7                                   | 300, 900, 1200, 1200, 900, 900, 1200      | 6600               |
| ( <i>R</i> )-9     | 6                                   | 300, 1200, 300, 900, 600, 300             | 3600               |
| ( <i>S</i> )-9     | 8                                   | 300, 1200, 1200, 300, 150, 1200, 300, 300 | 4950               |
| <b>10</b>          | 2                                   | 300, 300                                  | 600                |
| <b>dopamine</b>    | 3                                   | 180, 300, 300                             | 780                |
| <b>eticlopride</b> | 2                                   | 360, 300                                  | 660                |
| <b>total</b>       | 36                                  |                                           | 28590              |

<sup>a</sup>All simulations were started from a selected frame of a D<sub>3</sub>R/eticlopride simulation trajectory reported previously,<sup>39</sup> with the bound eticlopride replaced by the indicated ligand; the multiple trajectories for each ligand-bound condition were started from slightly different docked poses of the ligand, with the PP in the OBS and SP in the SBP.

**Table S2: Microanalysis Data:**

| Compound        | C          | H    | N     | C     | H    | N     |
|-----------------|------------|------|-------|-------|------|-------|
|                 | Calculated |      |       | Found |      |       |
| <b>3</b>        | 56.58      | 5.20 | 10.15 | 56.49 | 5.28 | 10.08 |
| (±)-4           | 56.93      | 5.35 | 10.62 | 56.79 | 5.69 | 10.32 |
| ( <i>R</i> )-4* |            |      |       |       |      |       |
| ( <i>S</i> )-4* |            |      |       |       |      |       |
| ( <i>R</i> )-6  | 55.45      | 6.65 | 9.24  | 55.62 | 6.66 | 9.05  |
| ( <i>S</i> )-6  | 55.45      | 6.65 | 9.24  | 55.70 | 6.60 | 8.98  |
| ( <i>R</i> )-7  | 53.99      | 6.27 | 9.69  | 54.24 | 6.26 | 9.57  |
| ( <i>S</i> )-7  | 53.99      | 6.27 | 9.69  | 54.20 | 6.13 | 9.54  |

\* Compound (free base) purity was determined by using HPLC and HRMS: (*R*)-4 *m/z* 473.1503 (M+H)<sup>+</sup> and (*S*)-4 *m/z* 473.1497 (M+H)<sup>+</sup>

**Table S3. Crystal data and structure refinement for (R)-7.**

|                                   |                                                                  |         |
|-----------------------------------|------------------------------------------------------------------|---------|
| Empirical formula                 | C <sub>13</sub> H <sub>18</sub> Cl <sub>2</sub> N <sub>2</sub> O |         |
| Formula weight                    | 289.19                                                           |         |
| Temperature                       | 150(2) K                                                         |         |
| Wavelength                        | 1.54178 Å                                                        |         |
| Crystal system                    | Orthorhombic                                                     |         |
| Space group                       | P2 <sub>1</sub> 2 <sub>1</sub> 2 <sub>1</sub>                    |         |
| Unit cell dimensions              | a = 7.4149(3) Å                                                  | a = 90° |
|                                   | b = 11.2516(4) Å                                                 | b = 90° |
|                                   | c = 16.6967(5) Å                                                 | g = 90° |
| Volume                            | 1393.00(9) Å <sup>3</sup>                                        |         |
| Z                                 | 4                                                                |         |
| Density (calculated)              | 1.379 Mg/m <sup>3</sup>                                          |         |
| Absorption coefficient            | 4.109 mm <sup>-1</sup>                                           |         |
| F(000)                            | 608                                                              |         |
| Crystal size                      | 0.445 x 0.161 x 0.084 mm <sup>3</sup>                            |         |
| θ range for data collection       | 4.739 to 68.870°                                                 |         |
| Index ranges                      | -7<=h<=8, -13<=k<=13, -16<=l<=19                                 |         |
| Reflections collected             | 7795                                                             |         |
| Independent reflections           | 2356 [R(int) = 0.0212]                                           |         |
| Completeness to θ = 67.679°       | 97.1 %                                                           |         |
| Absorption correction             | Semi-empirical from equivalents                                  |         |
| Max. and min. transmission        | 0.7531 and 0.5671                                                |         |
| Refinement method                 | Full-matrix least-squares on F <sup>2</sup>                      |         |
| Data / restraints / parameters    | 2356 / 0 / 164                                                   |         |
| Goodness-of-fit on F <sup>2</sup> | 1.037                                                            |         |
| Final R indices [I>2σ(I)]         | R1 = 0.0197, wR2 = 0.0535                                        |         |
| R indices (all data)              | R1 = 0.0200, wR2 = 0.0536                                        |         |
| Absolute structure parameter      | 0.047(4)                                                         |         |
| Extinction coefficient            | n/a                                                              |         |
| Largest diff. peak and hole       | 0.182 and -0.186 e.Å <sup>-3</sup>                               |         |

**Table S4. Crystal data and structure refinement for (S)-7.**

|                                   |                                                                  |         |
|-----------------------------------|------------------------------------------------------------------|---------|
| Empirical formula                 | C <sub>13</sub> H <sub>18</sub> Cl <sub>2</sub> N <sub>2</sub> O |         |
| Formula weight                    | 289.19                                                           |         |
| Temperature                       | 150(2) K                                                         |         |
| Wavelength                        | 1.54178 Å                                                        |         |
| Crystal system                    | Orthorhombic                                                     |         |
| Space group                       | P2 <sub>1</sub> 2 <sub>1</sub> 2 <sub>1</sub>                    |         |
| Unit cell dimensions              | a = 7.4199(3) Å                                                  | a = 90° |
|                                   | b = 11.2614(5) Å                                                 | b = 90° |
|                                   | c = 16.7031(7) Å                                                 | g = 90° |
| Volume                            | 1395.69(10) Å <sup>3</sup>                                       |         |
| Z                                 | 4                                                                |         |
| Density (calculated)              | 1.376 Mg/m <sup>3</sup>                                          |         |
| Absorption coefficient            | 4.101 mm <sup>-1</sup>                                           |         |
| F(000)                            | 608                                                              |         |
| Crystal size                      | 0.291 x 0.184 x 0.055 mm <sup>3</sup>                            |         |
| θ range for data collection       | 4.736 to 68.298°                                                 |         |
| Index ranges                      | -8<=h<=8, -13<=k<=12, -18<=l<=20                                 |         |
| Reflections collected             | 8180                                                             |         |
| Independent reflections           | 2401 [R(int) = 0.0243]                                           |         |
| Completeness to θ = 67.679°       | 99.3 %                                                           |         |
| Absorption correction             | Semi-empirical from equivalents                                  |         |
| Max. and min. transmission        | 0.7531 and 0.4985                                                |         |
| Refinement method                 | Full-matrix least-squares on F <sup>2</sup>                      |         |
| Data / restraints / parameters    | 2401 / 0 / 168                                                   |         |
| Goodness-of-fit on F <sup>2</sup> | 1.042                                                            |         |
| Final R indices [I>2σ(I)]         | R1 = 0.0199, wR2 = 0.0571                                        |         |
| R indices (all data)              | R1 = 0.0201, wR2 = 0.0573                                        |         |
| Absolute structure parameter      | 0.047(5)                                                         |         |
| Extinction coefficient            | n/a                                                              |         |
| Largest diff. peak and hole       | 0.151 and -0.151 e.Å <sup>-3</sup>                               |         |

**Figure S1. Quantitative metrics used by PIA-GPCR.** The heatmaps show the average difference of the metric values between the active and inactive states in  $\beta$ 2AR (active-state PDBs: 3P0G, 3SN6, 4LDE, 4LDL, 4LDO; inactive-state PDBs: 2RH1, 3D4S, 3NYA, 3NY8, 3NY9) and M2R (active-state PDBs: 4MQS, 4MQT; inactive-state PDB: 3UON). Each cell in the heatmap is colored based on the magnitude of the difference in the metric values measured for the helix sub-segments or binding site residue pair labeled on the X and Y axes. The color is scaled from blue to red, corresponding to the increase and decrease, respectively, of the metric values in the active state compared to the inactive state.

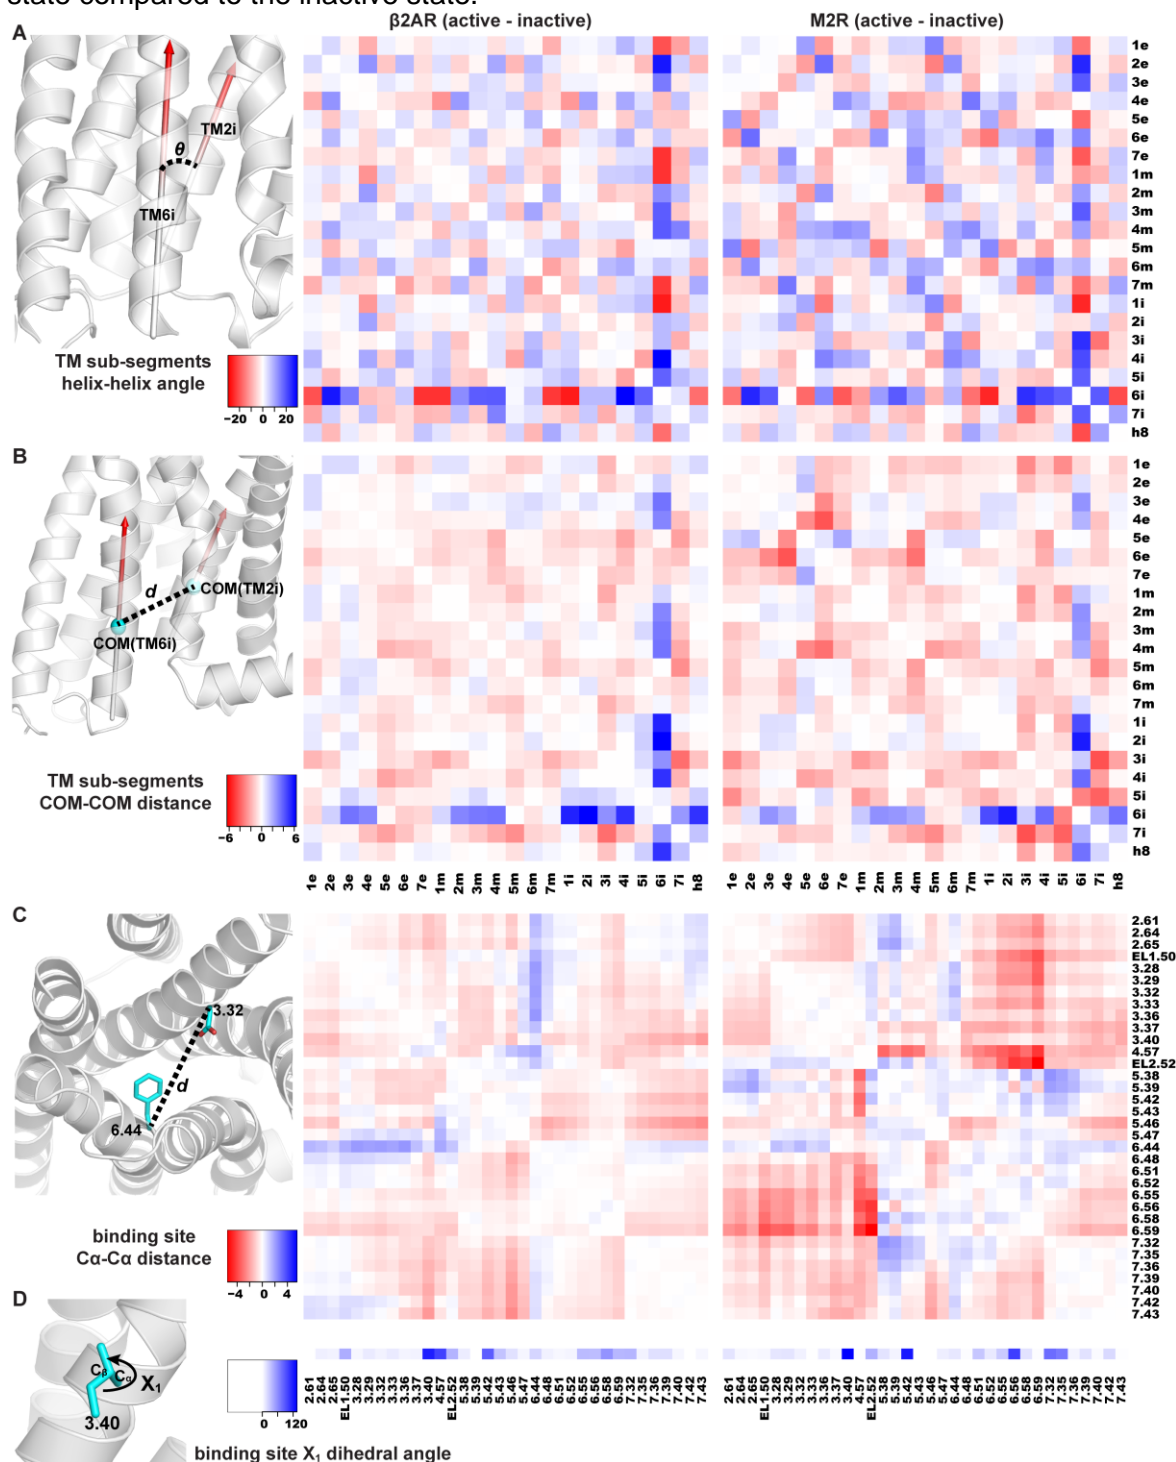

**Figure S2. Comparison of the conformations of  $\beta$ 1AR bound with partial agonists and antagonists.** See Experimental Methods and Figure S1 for the descriptions of the quantitative metrics shown in (A)-(D). The crystal structures of  $\beta$ 1AR used in the analysis include those bound with partial agonists (PDBs: 2Y00, 2Y01, 2Y04) and an antagonist (PDBs: 2YCW).

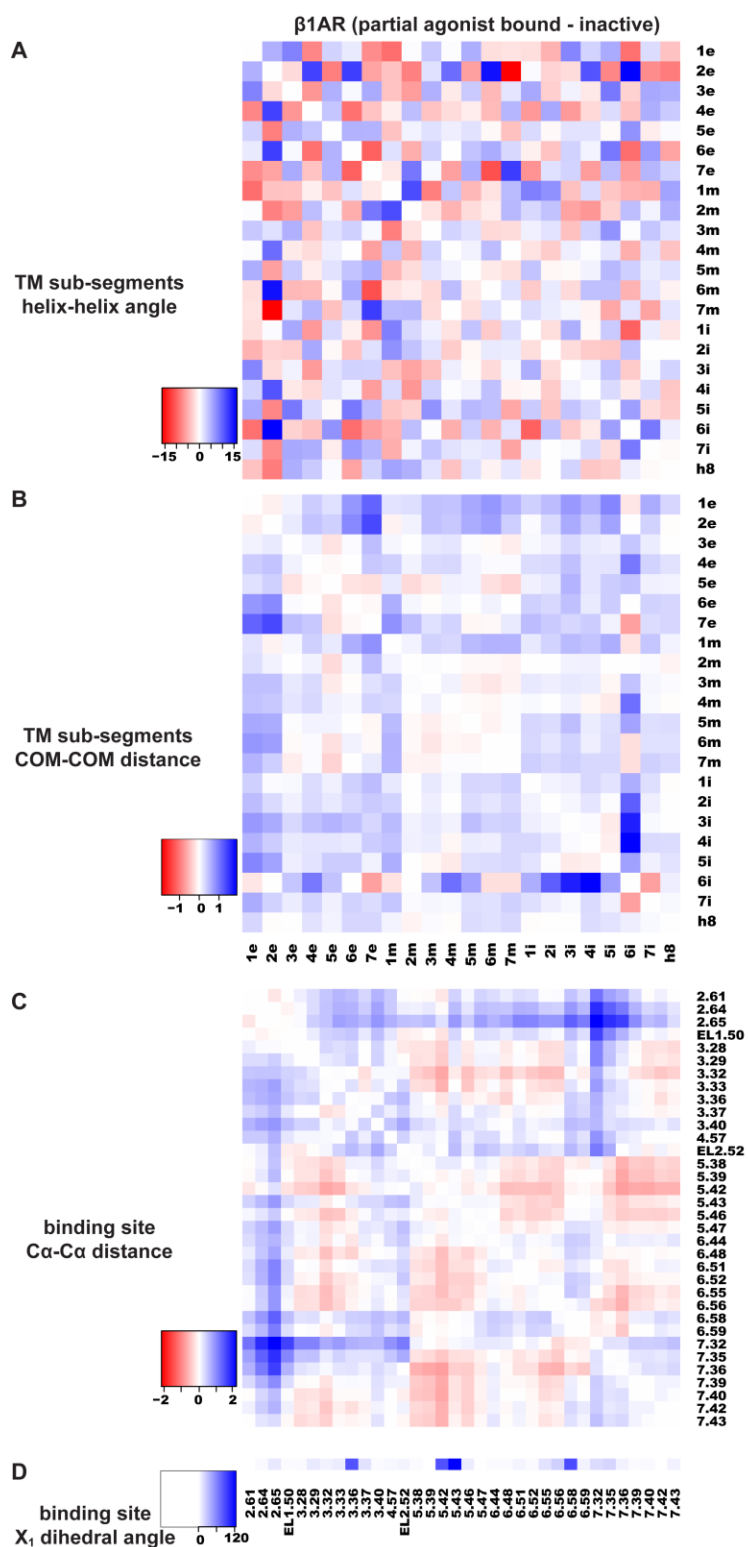

**Figure S3. Comparison of the conformations of D<sub>3</sub>R bound with dopamine and eticlopride.**  
 See Experimental Methods and Figure S1 for the descriptions of the quantitative metrics shown.

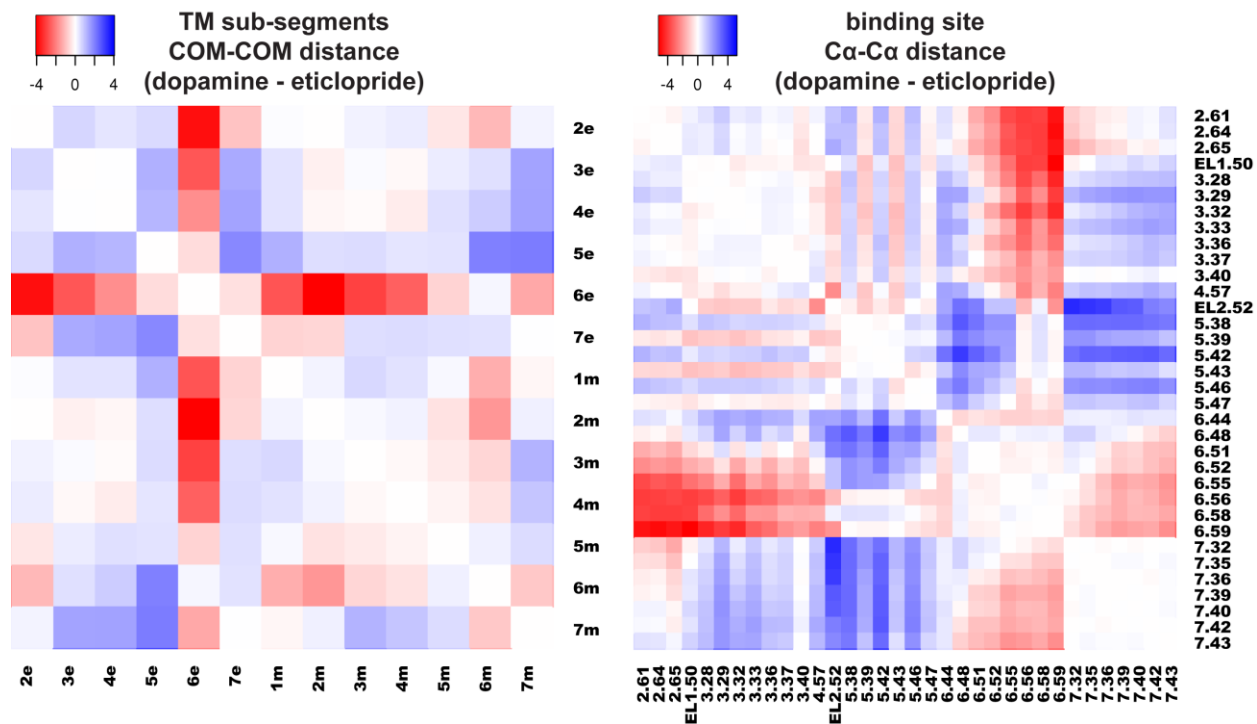



Figure S4. Mass spectrum Analysis of (*R*)-4 in THA using HRMS

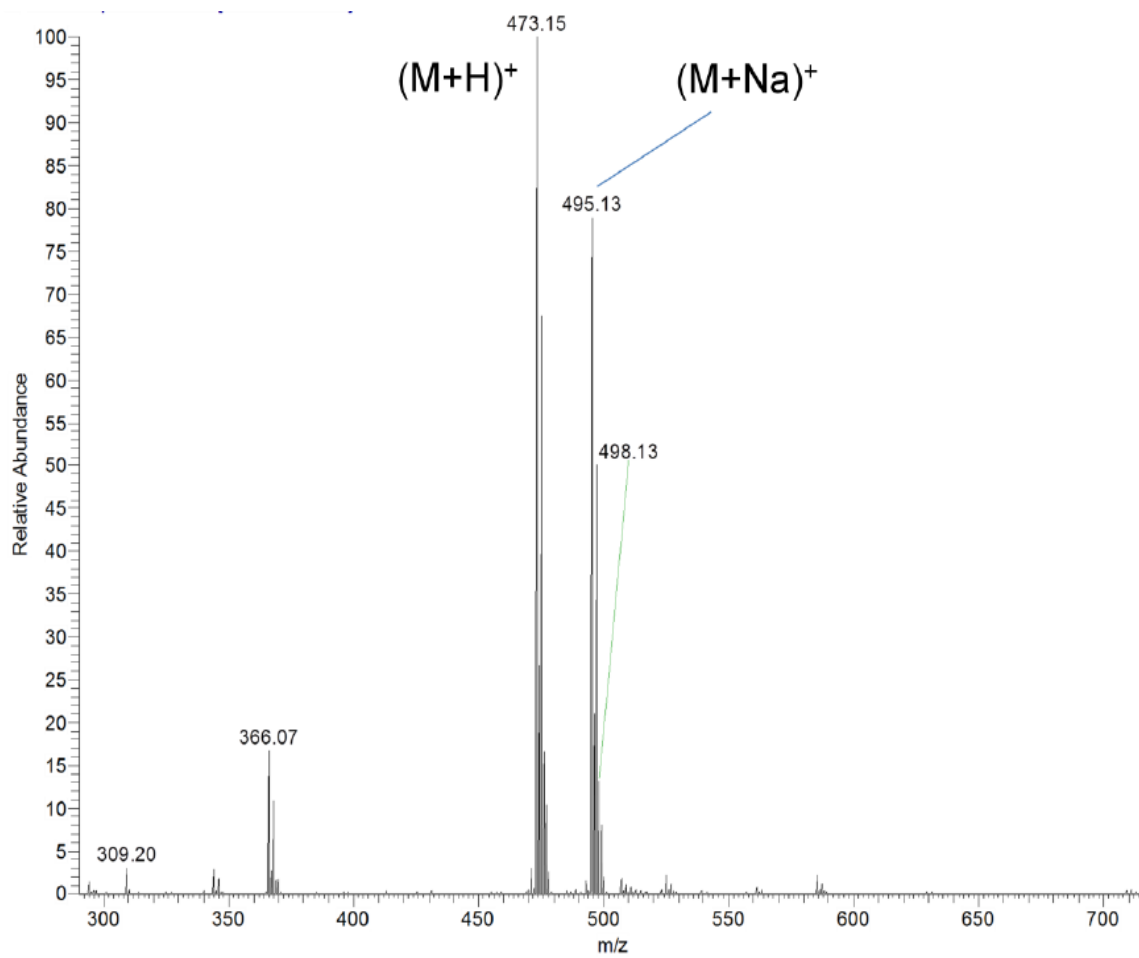

Figure S5. Mass spectrum Analysis of (S)-4 in THA using HRMS

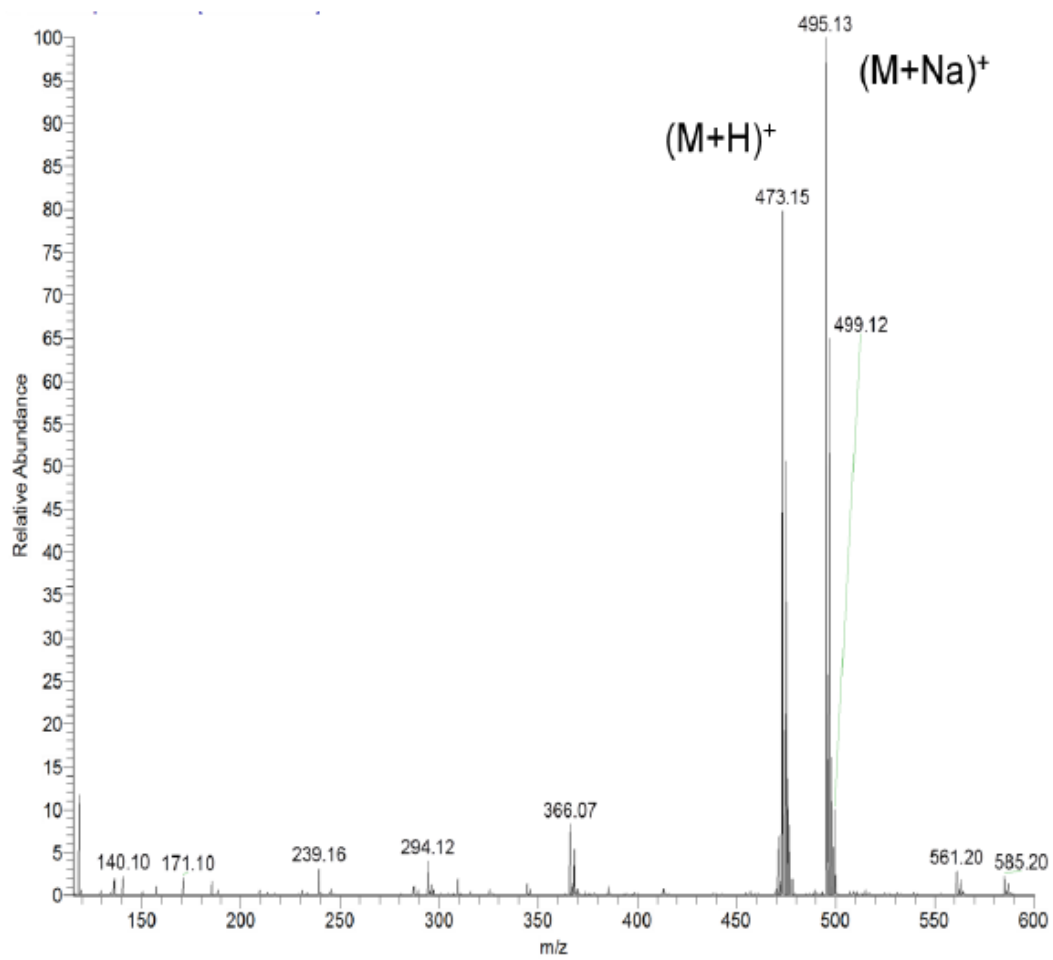

**Figure S6. HPLC chromatogram analysis for ( $\pm$ )-4**

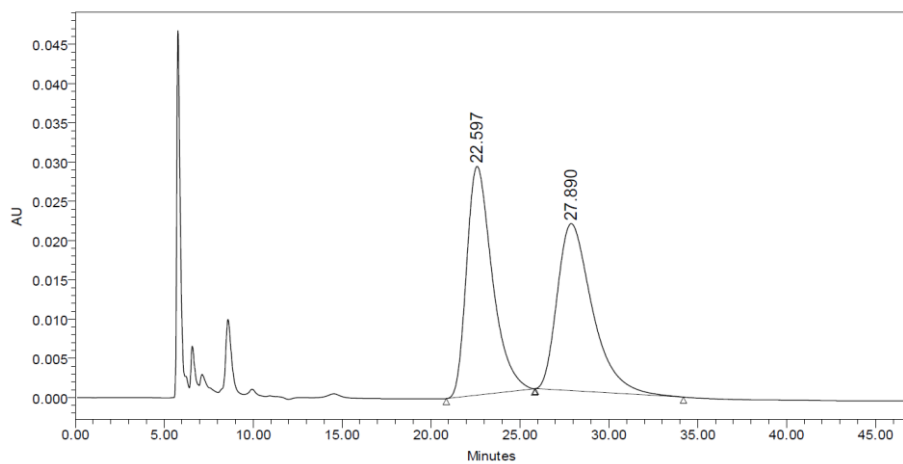

**Figure S7. HPLC chromatogram analysis for (*R*)-4**

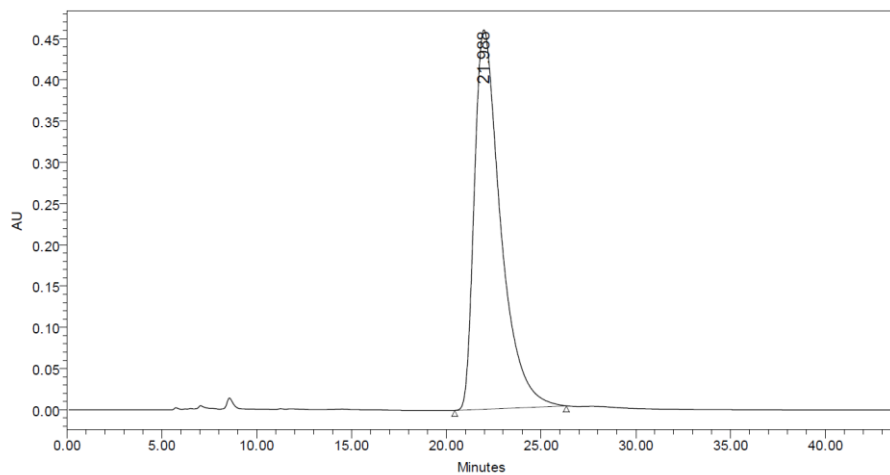

**Figure S8. HPLC chromatogram analysis for (S)-4**

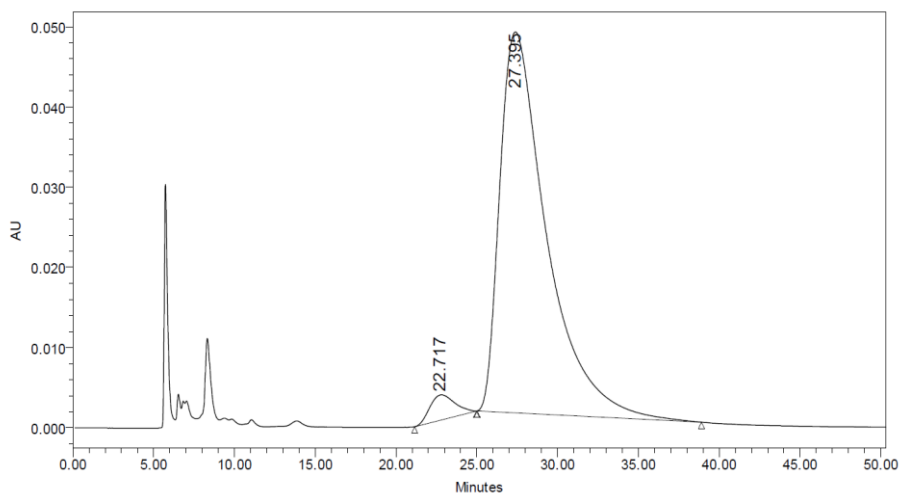

**Figure S9. HPLC chromatogram analysis for (±)-7**

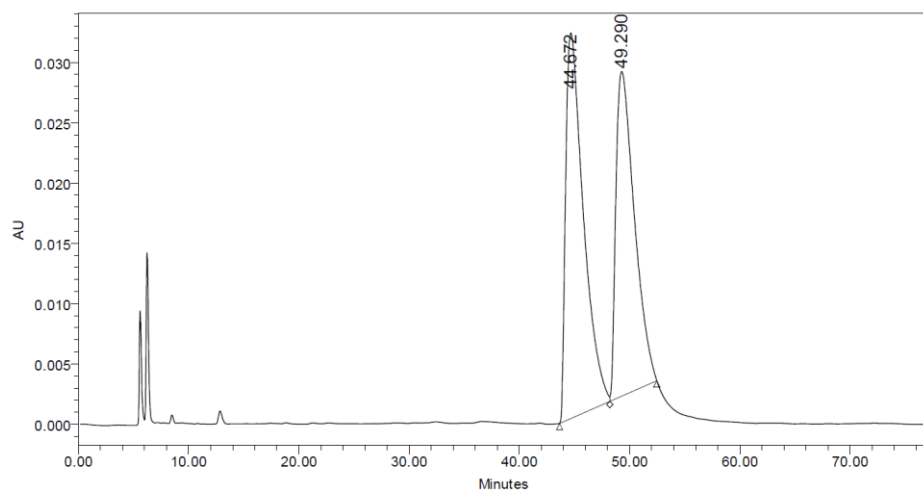

**Figure S10. HPLC chromatogram analysis for (R)-7**

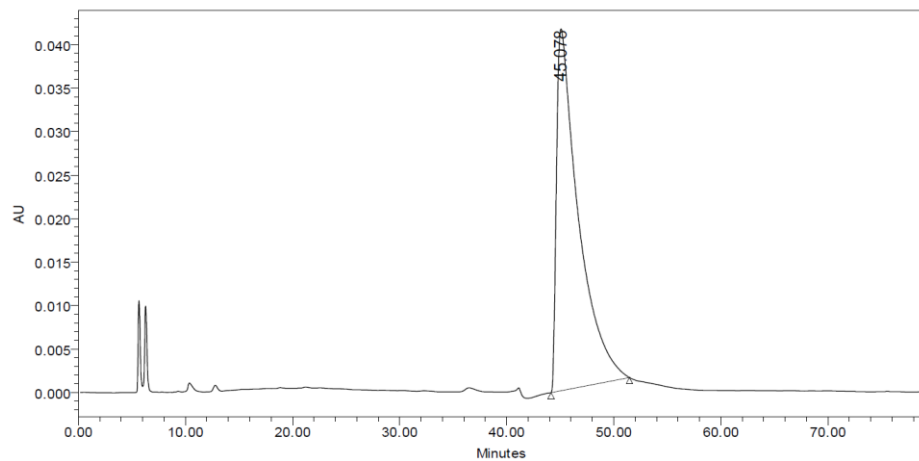

**Figure S11. HPLC chromatogram analysis for (S)-7**

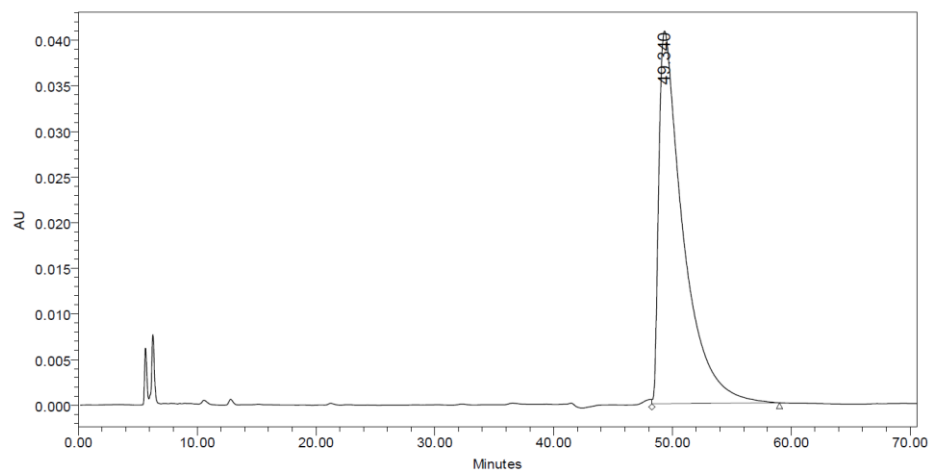

Figure S12. X-ray crystal structure of (*R*)-7. Displacement ellipsoids are at the 50% level.

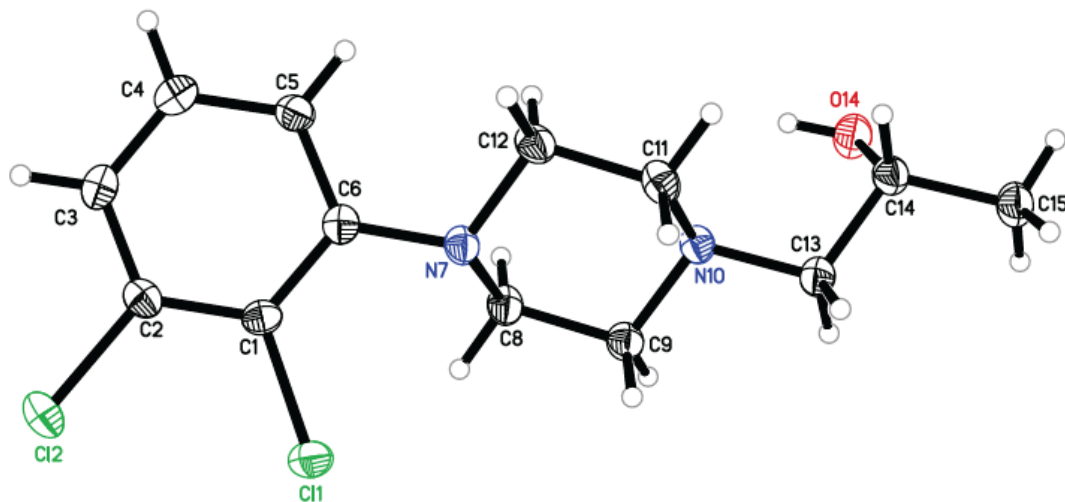

Figure S13. X-ray crystal structure of (*S*)-7. Displacement ellipsoids are at the 50% level.

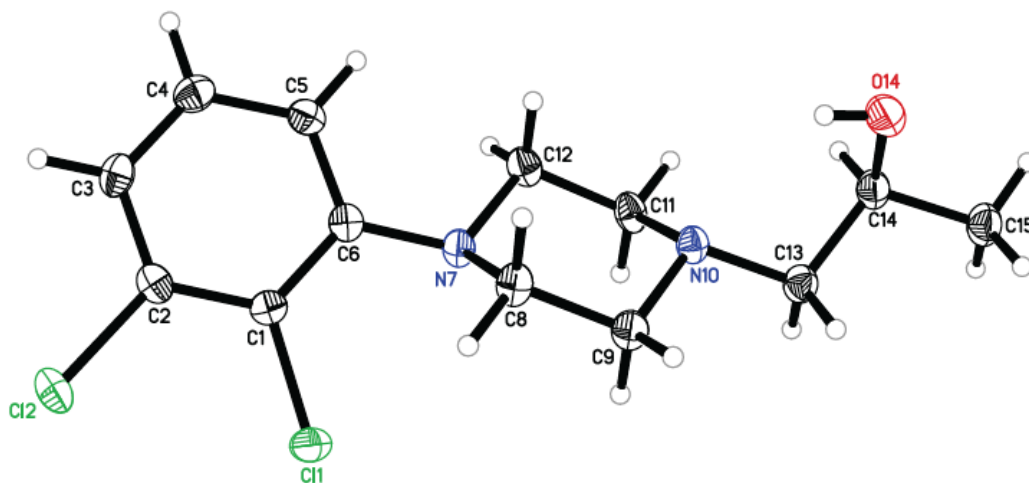

Supplement: NIHMS886047-supplement-Supplemental_info.pdf [file NIHMS886047-supplement-Supplemental_info.pdf]
